# Supplementary material for: Assessing the Interpretability–Performance Trade-Off of Artificial Neural Networks Using Sentinel Fish Health Data
Source: MDPI journal article supplement (doi:10.3390/environments11050094), 2024-05-03
Supplement: s1 [file s1]

## Supplementary Materials

Table S1: Selected Hyperparameters for the Standard NN for Each of the Three Responses

| Optimal Hyperparameters for Each of the Three Responses |                  |                    |                          |                          |
|---------------------------------------------------------|------------------|--------------------|--------------------------|--------------------------|
|                                                         |                  | Adjusted<br>Weight | Adjusted<br>Gonad Weight | Adjusted<br>Liver Weight |
| Layer 1                                                 | Units            | 37                 | 118                      | 124                      |
|                                                         | $\ell_1$ Penalty | 0.012              | 0.382                    | 0.215                    |
|                                                         | $\ell_2$ Penalty | 0.013              | 0.845                    | 0.594                    |
| Layer 2                                                 | Units            | 30                 | 44                       | 63                       |
|                                                         | $\ell_1$ Penalty | 0.010              | 0.641                    | 0.182                    |
|                                                         | $\ell_2$ Penalty | 0.063              | 0.312                    | 0.214                    |
| Layer 3                                                 | Units            | 12                 | 28                       | 32                       |
|                                                         | Epochs           | 225                | 118                      | 358                      |
|                                                         | Batch Size       | 19                 | 44                       | 63                       |
|                                                         | Patience         | 10                 | 10                       | 10                       |
|                                                         | Optimizer        | RMSProp            | SGD                      | RMSProp                  |

Table S2: Selected Hyperparameters for the Hybrid NN for Each of the Three Responses

| Optimal Hyperparameters for Each of the Three Responses |                  |                 |                       |                       |
|---------------------------------------------------------|------------------|-----------------|-----------------------|-----------------------|
|                                                         |                  | Adjusted Weight | Adjusted Gonad Weight | Adjusted Liver Weight |
| Layer 1                                                 | Units            | 73              | 118                   | 124                   |
|                                                         | $\ell_1$ Penalty | 0.133           | 0.382                 | 0.215                 |
|                                                         | $\ell_2$ Penalty | 0.133           | 0.845                 | 0.594                 |
| Layer 2                                                 | Units            | 30              | 44                    | 63                    |
|                                                         | $\ell_1$ Penalty | 0.057           | 0.641                 | 0.182                 |
|                                                         | $\ell_2$ Penalty | 0.051           | 0.312                 | 0.214                 |
| Layer 3                                                 | Units            | 29              | 28                    | 32                    |
|                                                         | Epochs           | 311             | 118                   | 358                   |
|                                                         | Batch Size       | 14              | 44                    | 63                    |
|                                                         | Patience         | 36              | 28                    | 32                    |
|                                                         | Optimizer        | RMSPProp        | SGD                   | RMSPProp              |
